# Supplementary material for: Transposing an active fault database into a seismic hazard fault model for nuclear facilities – Part 1: Building a database of potentially active faults (BDFA) for metropolitan France
Source: Copernicus journal article supplement (doi:10.5194/nhess-17-1573-2017), 2017-09-20
Supplement: Supplementary file 1 [file nhess-17-1573-2017-supplement.zip]

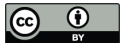

## *Supplement of*

# **Transposing an active fault database into a seismic hazard fault model for nuclear facilities – Part 1: Building a database of potentially active faults (BDFA) for metropolitan France**

**H. Jomard et al.**

*Correspondence to:* Hervé Jomard ([herve.jomard@irsn.fr](mailto:herve.jomard@irsn.fr))

- [nhess-17-1573-2017-supplement-title-page.pdf](#)
- [BDFA\\_2016.kmz](#)
- [Jomard\\_BDFA\\_TABLES.xlsx](#)
- [Jomard\\_INDEXES\\_TABLES.xlsx](#)
- [readme\\_supplementary\\_materials.docx](#)

The copyright of individual parts of the supplement might differ from the CC BY 3.0 License.
